# Supplementary material
Source: PubMed Central journal article supplement (PMC3195049)

**Supplement** – Bergen *et al.*, Clinically relevant plasma concentrations of colistin in combination with imipenem enhance PD activity against MDR *P. aeruginosa* at multiple inocula

**Table S1:** Log changes at 6, 24 or 48 h at two inocula with colistin (Col) and imipenem (Imi) against 3 isolates of *P. aeruginosa* susceptible to both antibiotics. Gray background indicates activity (a reduction of  $\geq 1\text{-log}_{10}$  cfu/mL below the initial inoculum); green background indicates synergy (a  $\geq 2\text{-log}_{10}$  decrease in the number of cfu/mL between the combination and its most active component); red background indicates additivity (a 1.0 to  $< 2\text{-log}_{10}$  decrease in the number of cfu/mL between the combination and its most active component). Data presented here represents additional data not included in Table 2 of the main manuscript.

| Isolate       | Inoculum (cfu/mL) | Time (h) | Log change (= $\log_{10}(\text{CFU}_t) - \log_{10}(\text{CFU}_0)$ ) |                                          |                                        |                                         |
|---------------|-------------------|----------|---------------------------------------------------------------------|------------------------------------------|----------------------------------------|-----------------------------------------|
|               |                   |          | Col<br>16× MIC *                                                    | Col<br>16× MIC *<br>+<br>Imi<br>0.5× MIC | Col<br>16× MIC *<br>+<br>Imi<br>4× MIC | Col<br>16× MIC *<br>+<br>Imi<br>16× MIC |
| ATCC<br>27853 | ~10 <sup>6</sup>  | 6        | -6.03                                                               | -5.98                                    | -5.97                                  | -6.01                                   |
|               |                   | 24       | -1.23                                                               | -0.35                                    | -1.65                                  | <b>-6.01</b>                            |
|               |                   | 48       | +0.39                                                               | +0.90                                    | -0.98                                  | <b>-6.01</b>                            |
|               | ~10 <sup>8</sup>  | 6        | -7.68                                                               | -7.76                                    | -7.78                                  | -7.81                                   |
|               |                   | 24       | -3.34                                                               | -2.83                                    | <b>-7.78</b>                           | <b>-7.81</b>                            |
|               |                   | 48       | -1.97                                                               | -1.46                                    | <b>-7.78</b>                           | <b>-7.81</b>                            |
| 19056<br>muc  | ~10 <sup>6</sup>  | 6        | -5.16                                                               | -5.82                                    | -5.89                                  | -5.88                                   |
|               |                   | 24       | -5.16                                                               | -5.82                                    | -5.89                                  | -5.88                                   |
|               |                   | 48       | -0.37                                                               | -5.82                                    | -5.89                                  | -5.88                                   |
|               | ~10 <sup>8</sup>  | 6        | -7.94                                                               | -7.94                                    | -7.91                                  | -7.76                                   |
|               |                   | 24       | -7.94                                                               | -7.94                                    | -7.91                                  | -7.76                                   |
|               |                   | 48       | -5.03                                                               | -4.00                                    | -4.45                                  | <b>-7.76</b>                            |
| 20509<br>n/m  | ~10 <sup>6</sup>  | 6        | -5.89                                                               | -5.95                                    | -6.05                                  | -6.05                                   |
|               |                   | 24       | -0.94                                                               | <b>-3.35</b>                             | <b>-6.05</b>                           | <b>-6.05</b>                            |
|               |                   | 48       | +0.81                                                               | <b>-1.80</b>                             | <b>-4.27</b>                           | <b>-3.58</b>                            |
|               | ~10 <sup>8</sup>  | 6        | -3.41                                                               | -3.50                                    | <b>-4.94</b>                           | <b>-7.94</b>                            |
|               |                   | 24       | -0.28                                                               | <b>-1.58</b>                             | <b>-3.71</b>                           | <b>-4.49</b>                            |
|               |                   | 48       | +1.89                                                               | +1.03                                    | <b>-1.42</b>                           | <b>-3.22</b>                            |

\*For ATCC 27853, Col 8× MIC used at the 10<sup>6</sup> cfu/mL inoculum only.

**Table S2:** Log changes at 6, 24, or 48 h at two inocula with colistin (Col) and imipenem (Imi) against a colistin-resistant, imipenem-susceptible isolate and two colistin-susceptible, imipenem-resistant isolates of *P. aeruginosa*. Gray background indicates activity (a reduction of  $\geq 1$ -log<sub>10</sub> cfu/mL below the initial inoculum); green background indicates synergy (a  $\geq 2$ -log<sub>10</sub> decrease in the number of cfu/mL between the combination and its most active component); red background indicates additivity (a 1.0 to  $< 2$ -log<sub>10</sub> decrease in the number of cfu/mL between the combination and its most active component). For colistin-resistant isolate 19147 n/m, synergy or additivity were compared with imipenem monotherapy only. Data presented here represents additional data not included in Table 3 of the main manuscript.

| Isolate                           | Inoculum (cfu/mL) | Time (h) | Log change (= log <sub>10</sub> (CFU <sub>t</sub> ) - log <sub>10</sub> (CFU <sub>0</sub> )) |                                      |                                       |
|-----------------------------------|-------------------|----------|----------------------------------------------------------------------------------------------|--------------------------------------|---------------------------------------|
|                                   |                   |          | Col<br>32 mg/L<br>+<br>Imi<br>0.5× MIC                                                       | Col<br>32 mg/L<br>+<br>Imi<br>4× MIC | Col<br>32 mg/L<br>+<br>Imi<br>16× MIC |
| Col resistant,<br>Imi susceptible | ~10 <sup>6</sup>  | 6        | -2.81                                                                                        | -2.79                                | -3.15                                 |
|                                   |                   | 24       | -1.95                                                                                        | -3.95                                | -4.26                                 |
|                                   |                   | 48       | +1.58                                                                                        | -3.72                                | -4.21                                 |
|                                   | ~10 <sup>8</sup>  | 6        | -2.54                                                                                        | -2.65                                | -2.79                                 |
|                                   |                   | 24       | -1.02                                                                                        | -5.90                                | -6.11                                 |
|                                   |                   | 48       | -0.02                                                                                        | -3.09                                | -7.71                                 |

Table S2 (Continued):

| Isolate                                 | Inoculum<br>(cfu/mL) | Time<br>(h)      | Log change (= $\log_{10}(\text{CFU}_t) - \log_{10}(\text{CFU}_0)$ ) |                                        |                                        |                                       |              |
|-----------------------------------------|----------------------|------------------|---------------------------------------------------------------------|----------------------------------------|----------------------------------------|---------------------------------------|--------------|
|                                         |                      |                  | Col<br>16× MIC                                                      | Col<br>16× MIC<br>+<br>Imi<br>1.0 mg/L | Col<br>16× MIC<br>+<br>Imi<br>8.0 mg/L | Col<br>16× MIC<br>+<br>Imi<br>32 mg/L |              |
| Col<br>susceptible,<br>Imi<br>resistant | ~10 <sup>6</sup>     | 6                | -3.88                                                               | <b>-5.70</b>                           | <b>-5.77</b>                           | <b>-5.75</b>                          |              |
|                                         |                      | 24               | -3.68                                                               | -3.92                                  | <b>-5.77</b>                           | <b>-5.75</b>                          |              |
|                                         |                      | 48               | -1.29                                                               | <b>-2.89</b>                           | <b>-5.77</b>                           | <b>-5.75</b>                          |              |
|                                         | ~10 <sup>8</sup>     | 6                | -3.18                                                               | <b>-4.81</b>                           | <b>-4.97</b>                           | <b>-5.36</b>                          |              |
|                                         |                      | 24               | -2.95                                                               | -2.52                                  | -3.66                                  | <b>-6.22</b>                          |              |
|                                         |                      | 48               | -0.46                                                               | -0.01                                  | <b>-3.14</b>                           | <b>-4.24</b>                          |              |
|                                         | 20891 n/m            | ~10 <sup>6</sup> | 6                                                                   | -5.97                                  | -5.92                                  | -5.96                                 | -5.98        |
|                                         |                      |                  | 24                                                                  | -4.57                                  | <b>-5.92</b>                           | <b>-5.96</b>                          | <b>-5.98</b> |
|                                         |                      |                  | 48                                                                  | -3.20                                  | -3.77                                  | <b>-5.96</b>                          | <b>-5.98</b> |
| ~10 <sup>8</sup>                        |                      | 6                | -5.50                                                               | -5.97                                  | <b>-7.35</b>                           | <b>-7.52</b>                          |              |
|                                         |                      | 24               | -2.65                                                               | <b>-4.60</b>                           | <b>-5.35</b>                           | <b>-4.83</b>                          |              |
|                                         |                      | 48               | -2.61                                                               | <b>-3.65</b>                           | <b>-3.92</b>                           | -3.58                                 |              |



## Time-kill plots:

**Figure S1:** Time-kill curves for ATCC 27853 at an inoculum of  $\sim 10^6$  cfu/mL with (A) colistin alone, (B) imipenem alone, and (C) in combination. Panel (D) shows the PAPs at baseline (0 h) and after 48 h exposure to colistin monotherapy, colistin/imipenem combination therapy, or neither antibiotic (control). The Y-axis starts from the limit of detection and the limit of quantification (LOQ) is indicated by the horizontal broken line.

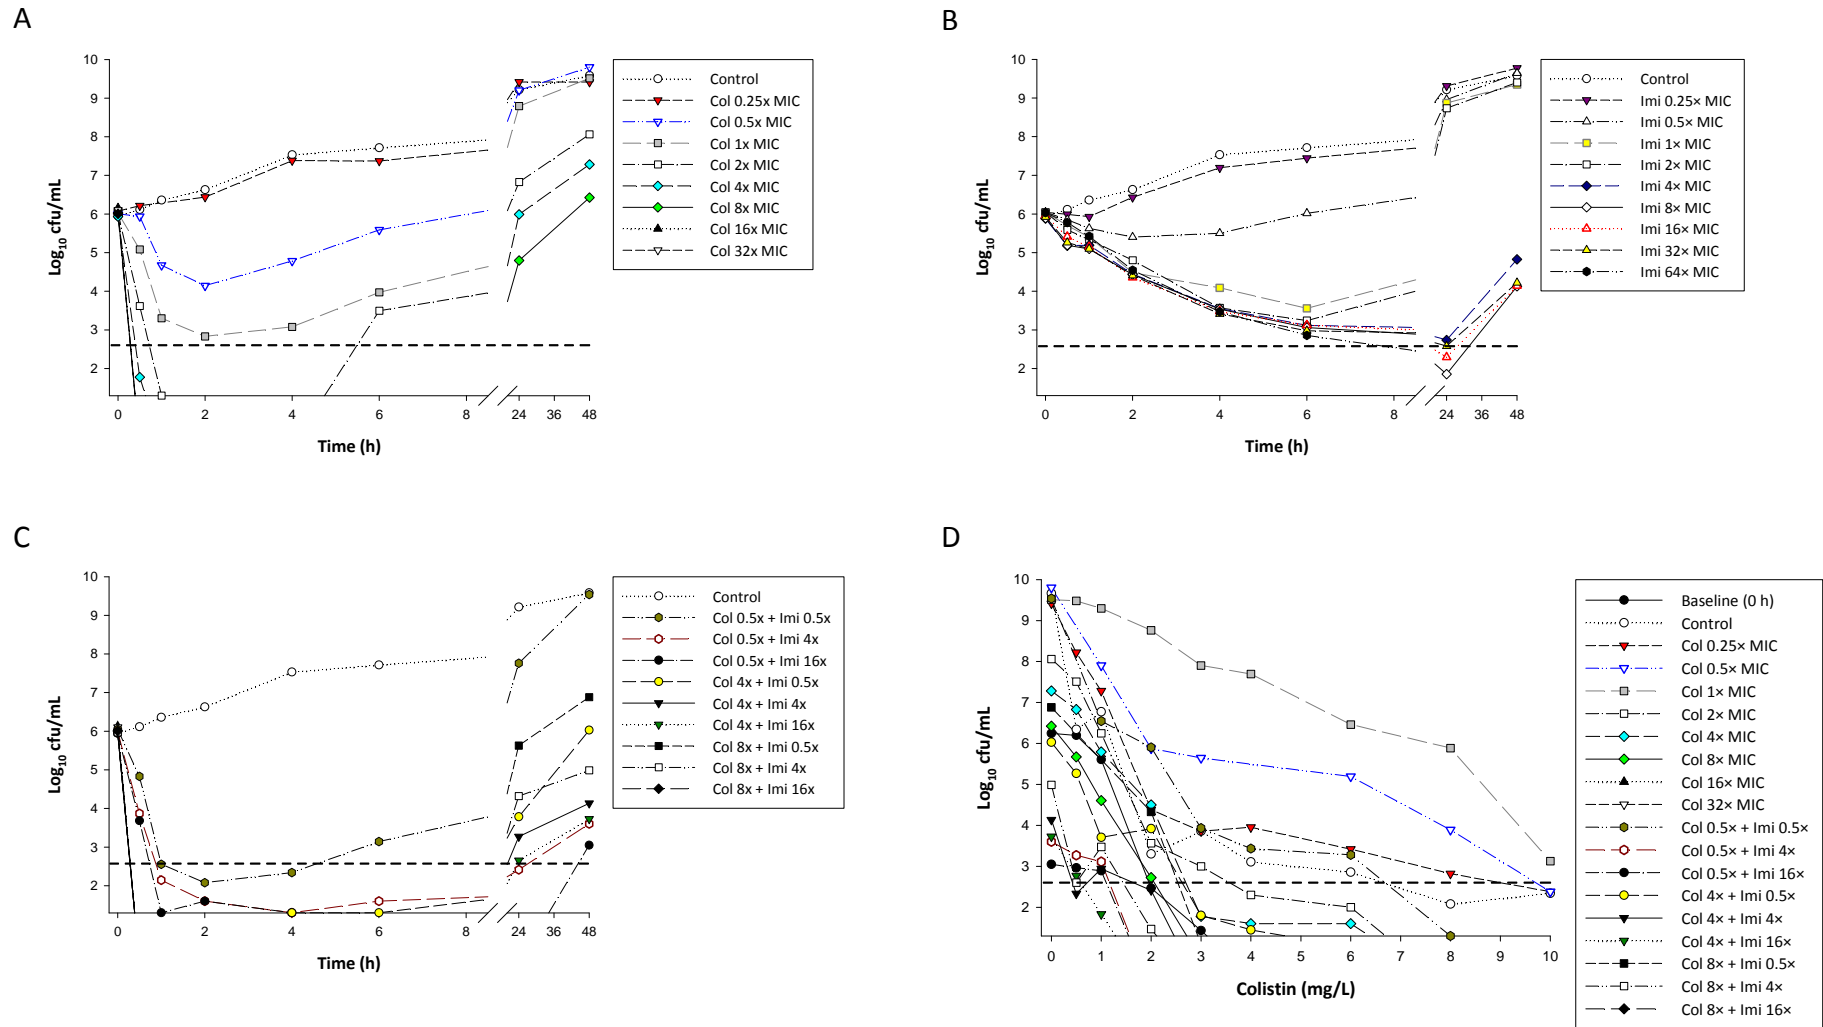

**Figure S2:** Time-kill curves for ATCC 27853 at an inoculum of  $\sim 10^8$  cfu/mL with (A) colistin alone, (B) imipenem alone, and (C) in combination. Panel (D) shows the PAPs at baseline (0 h) and after 48 h exposure to colistin monotherapy, colistin/imipenem combination therapy, or neither antibiotic (control). The Y-axis starts from the limit of detection and the limit of quantification (LOQ) is indicated by the horizontal broken line.

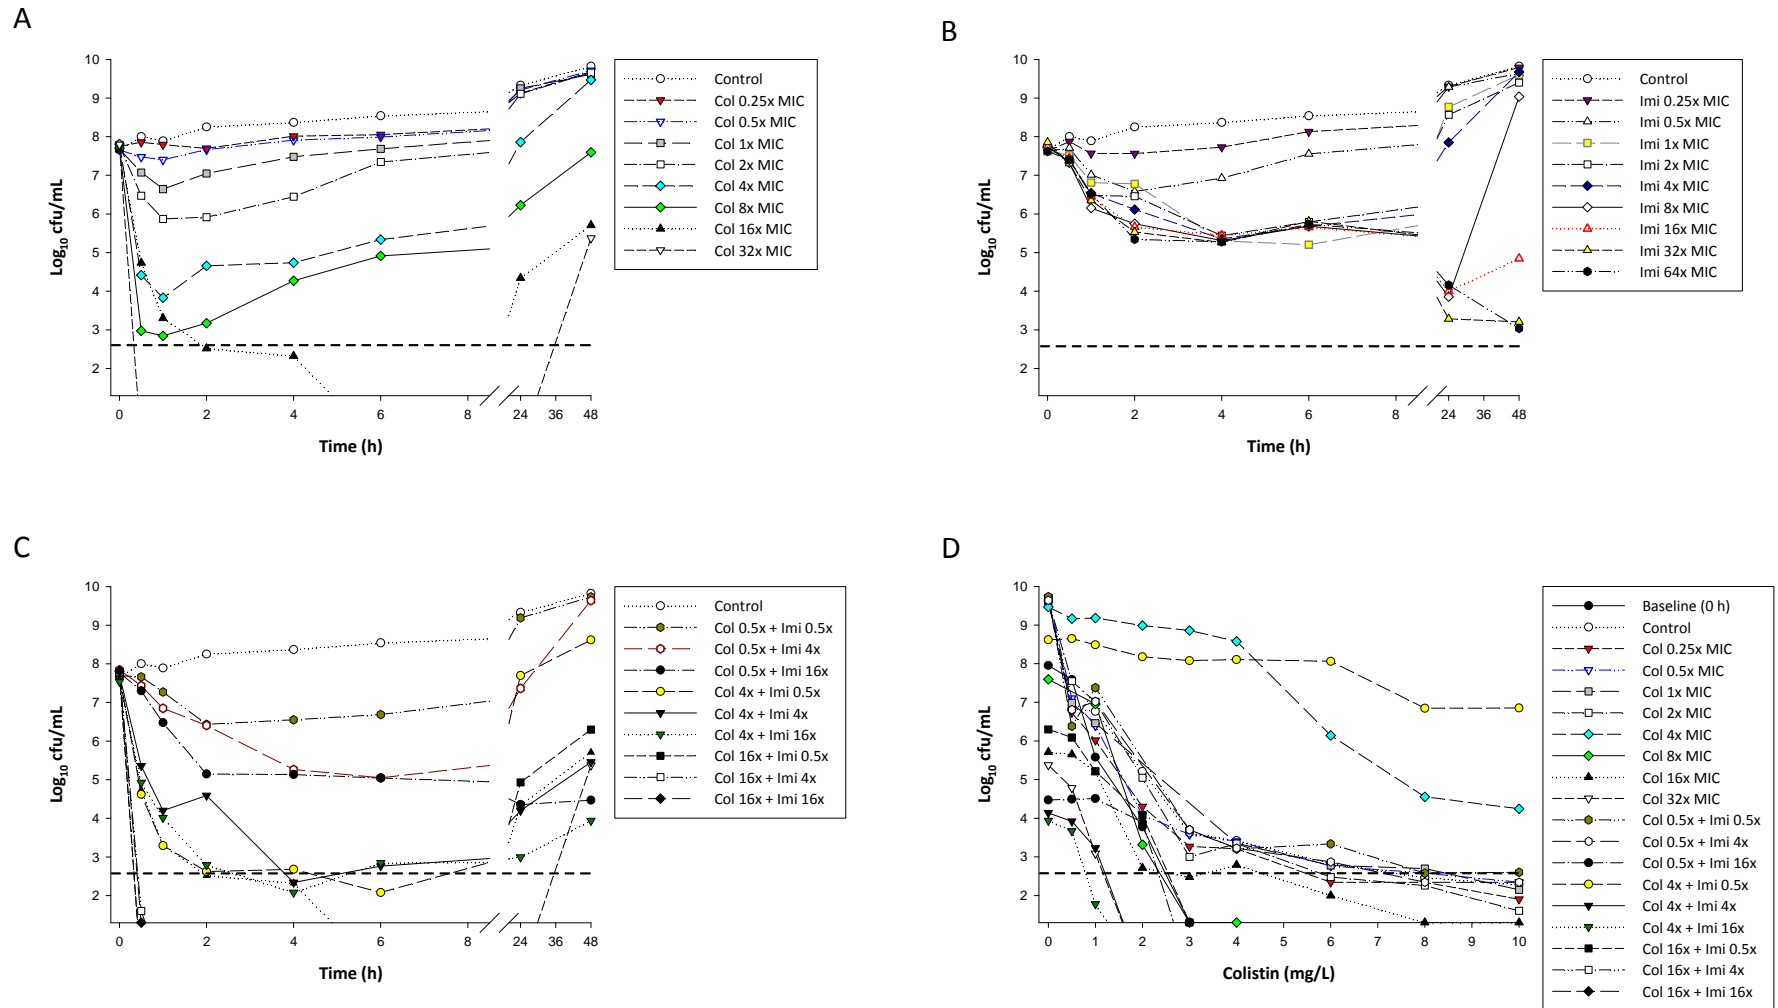

**Figure S3:** Time-kill curves for 19147 n/m at an inoculum of  $\sim 10^6$  cfu/mL with (A) colistin and imipenem alone, and (B) in combination. Panel (C) shows the PAPs at baseline (0 h) and after 48 h exposure to colistin monotherapy, colistin/imipenem combination therapy, or neither antibiotic (control). The Y-axis starts from the limit of detection and the limit of quantification (LOQ) is indicated by the horizontal broken line.

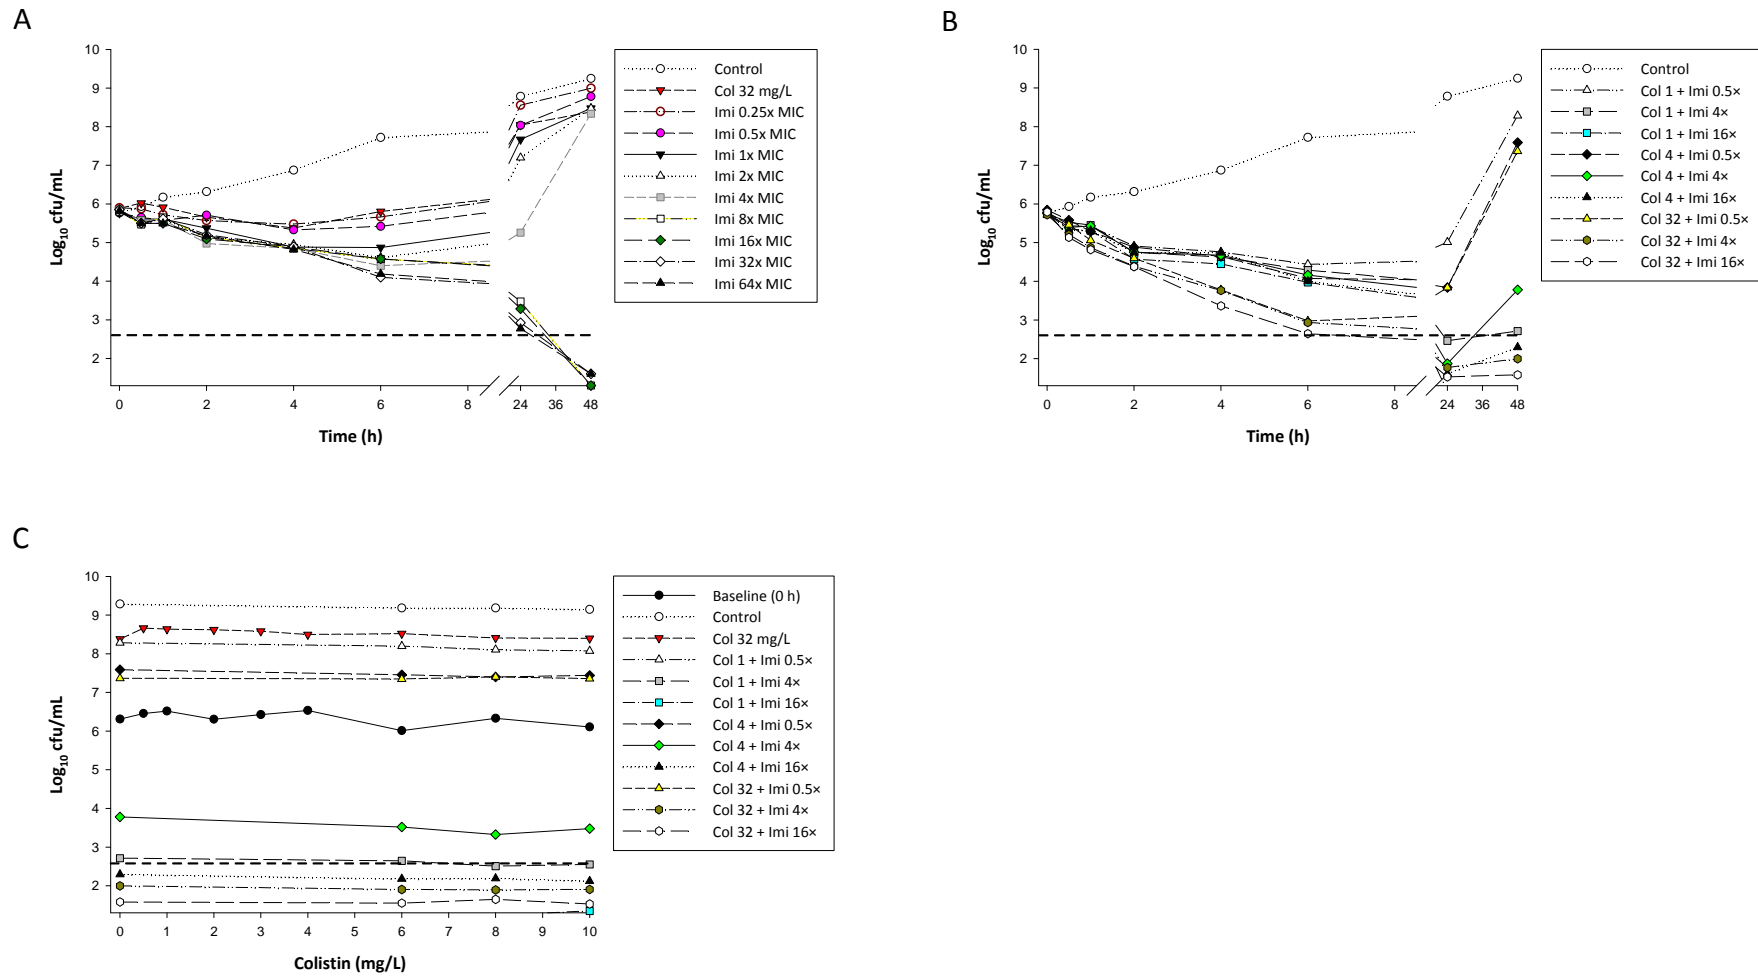

**Figure S4:** Time-kill curves for 19147 n/m at an inoculum of  $\sim 10^8$  cfu/mL with (A) colistin and imipenem alone, and (B) in combination. Panel (C) shows the PAPs at baseline (0 h) and after 48 h exposure to colistin monotherapy, colistin/imipenem combination therapy, or neither antibiotic (control). The Y-axis starts from the limit of detection and the limit of quantification (LOQ) is indicated by the horizontal broken line.

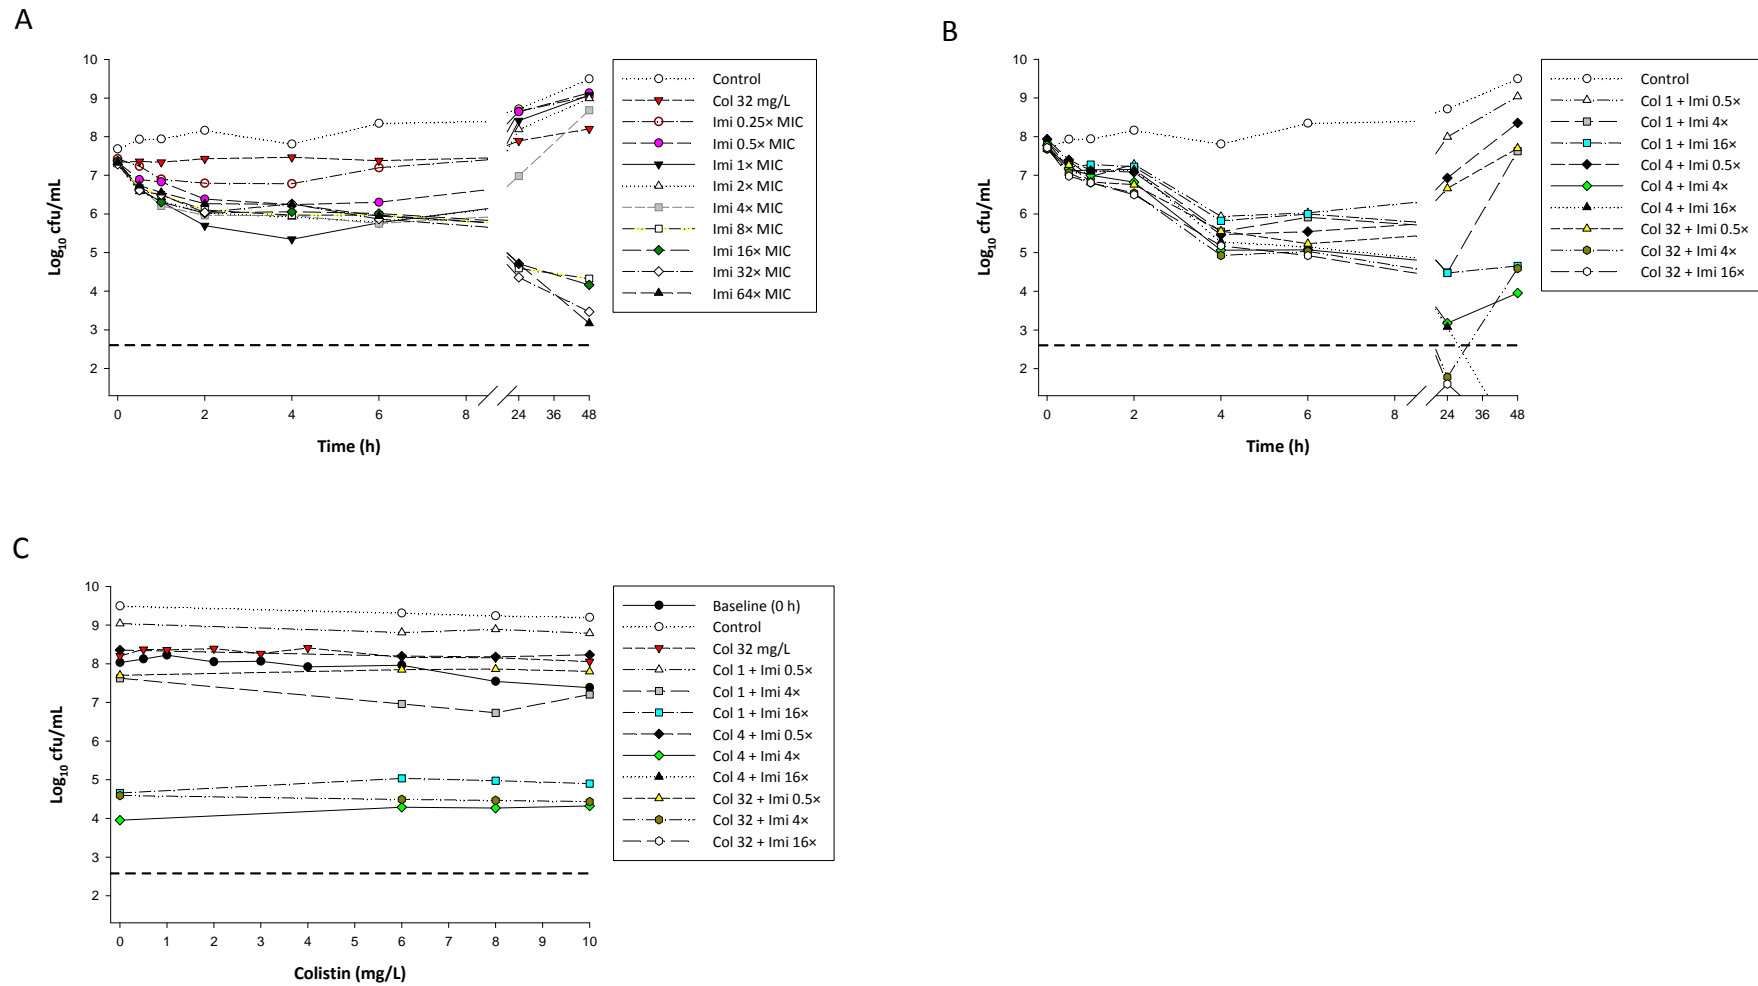



**Figure S5:** Time-kill curves for 19056 muc at an inoculum of  $\sim 10^6$  cfu/mL with (A) colistin alone, (B) imipenem alone, and (C) in combination. Panel (D) shows the PAPs at baseline (0 h) and after 48 h exposure to colistin monotherapy, colistin/imipenem combination therapy, or neither antibiotic (control). The Y-axis starts from the limit of detection and the limit of quantification (LOQ) is indicated by the horizontal broken line.

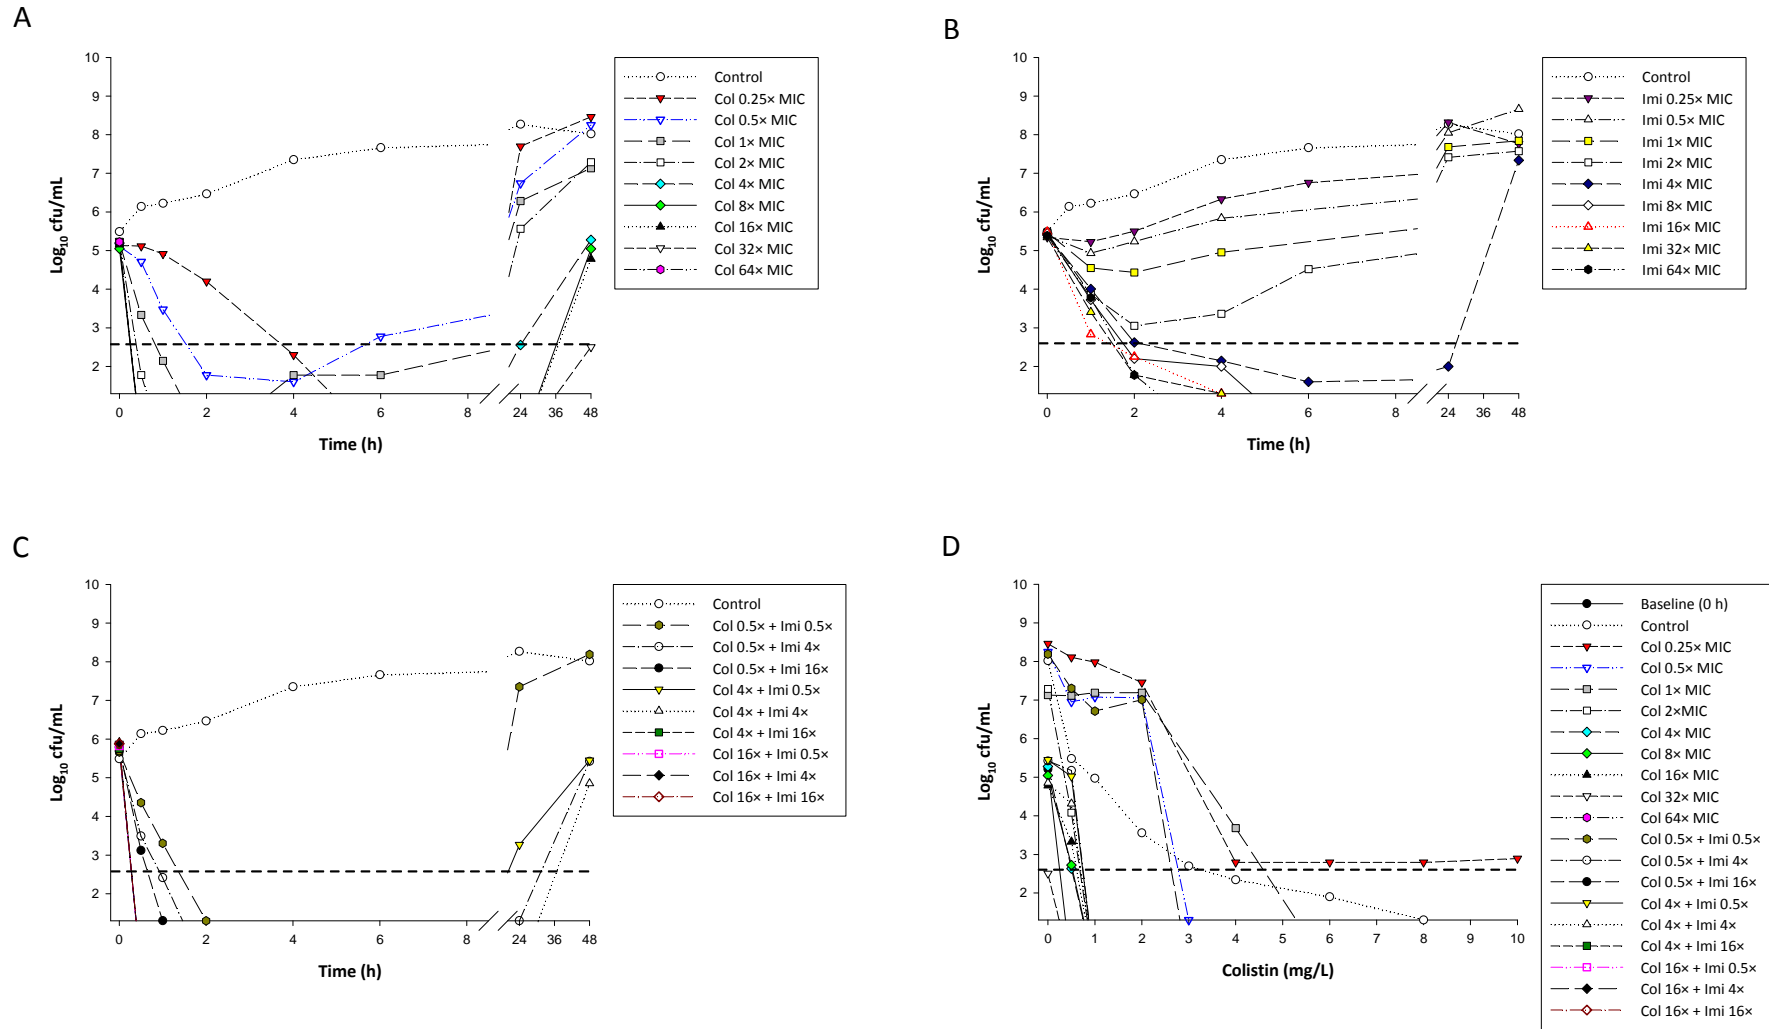

**Figure S6:** Time-kill curves for 19056 muc at an inoculum of  $\sim 10^8$  cfu/mL with (A) colistin alone, (B) imipenem alone, and (C) in combination. Panel (D) shows the PAPs at baseline (0 h) and after 48 h exposure to colistin monotherapy, colistin/imipenem combination therapy, or neither antibiotic (control). The Y-axis starts from the limit of detection and the limit of quantification (LOQ) is indicated by the horizontal broken line.

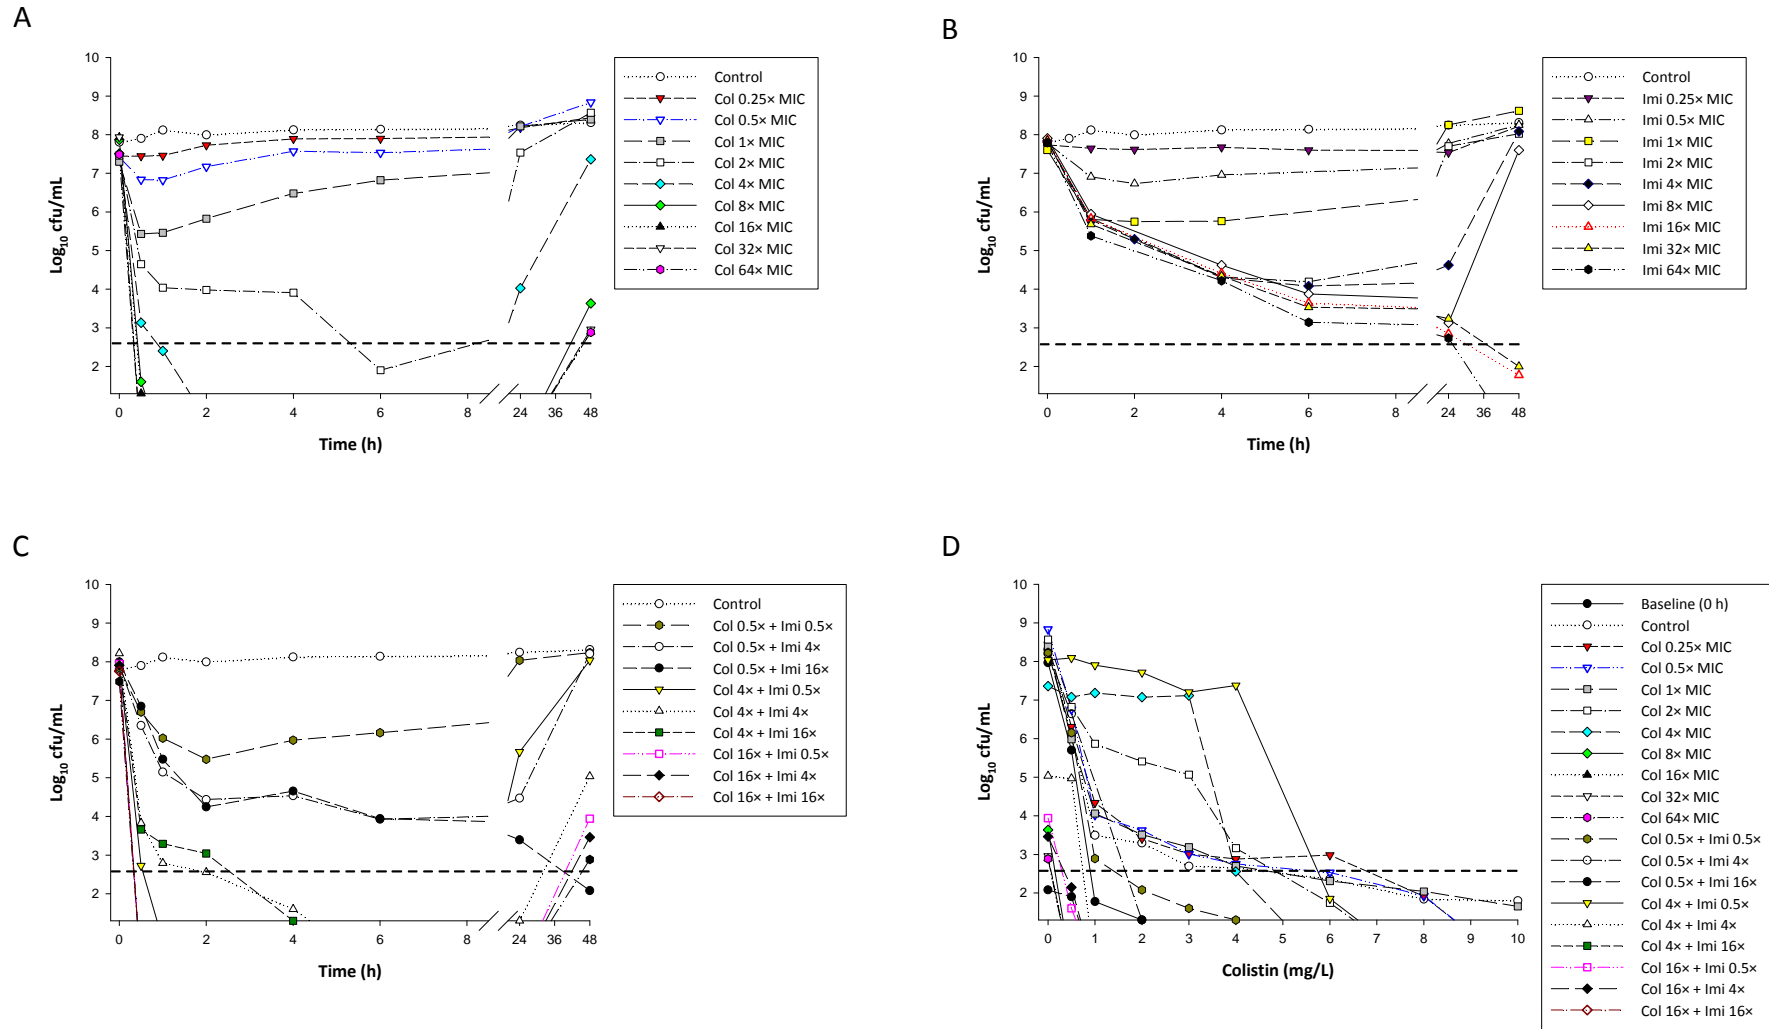

**Figure S7:** Time-kill curves for 20509 n/m at an inoculum of  $\sim 10^6$  cfu/mL with (A) colistin alone, (B) imipenem alone, and (C) in combination. Panel (D) shows the PAPs at baseline (0 h) and after 48 h exposure to colistin monotherapy, colistin/imipenem combination therapy, or neither antibiotic (control). The Y-axis starts from the limit of detection and the limit of quantification (LOQ) is indicated by the horizontal broken line.

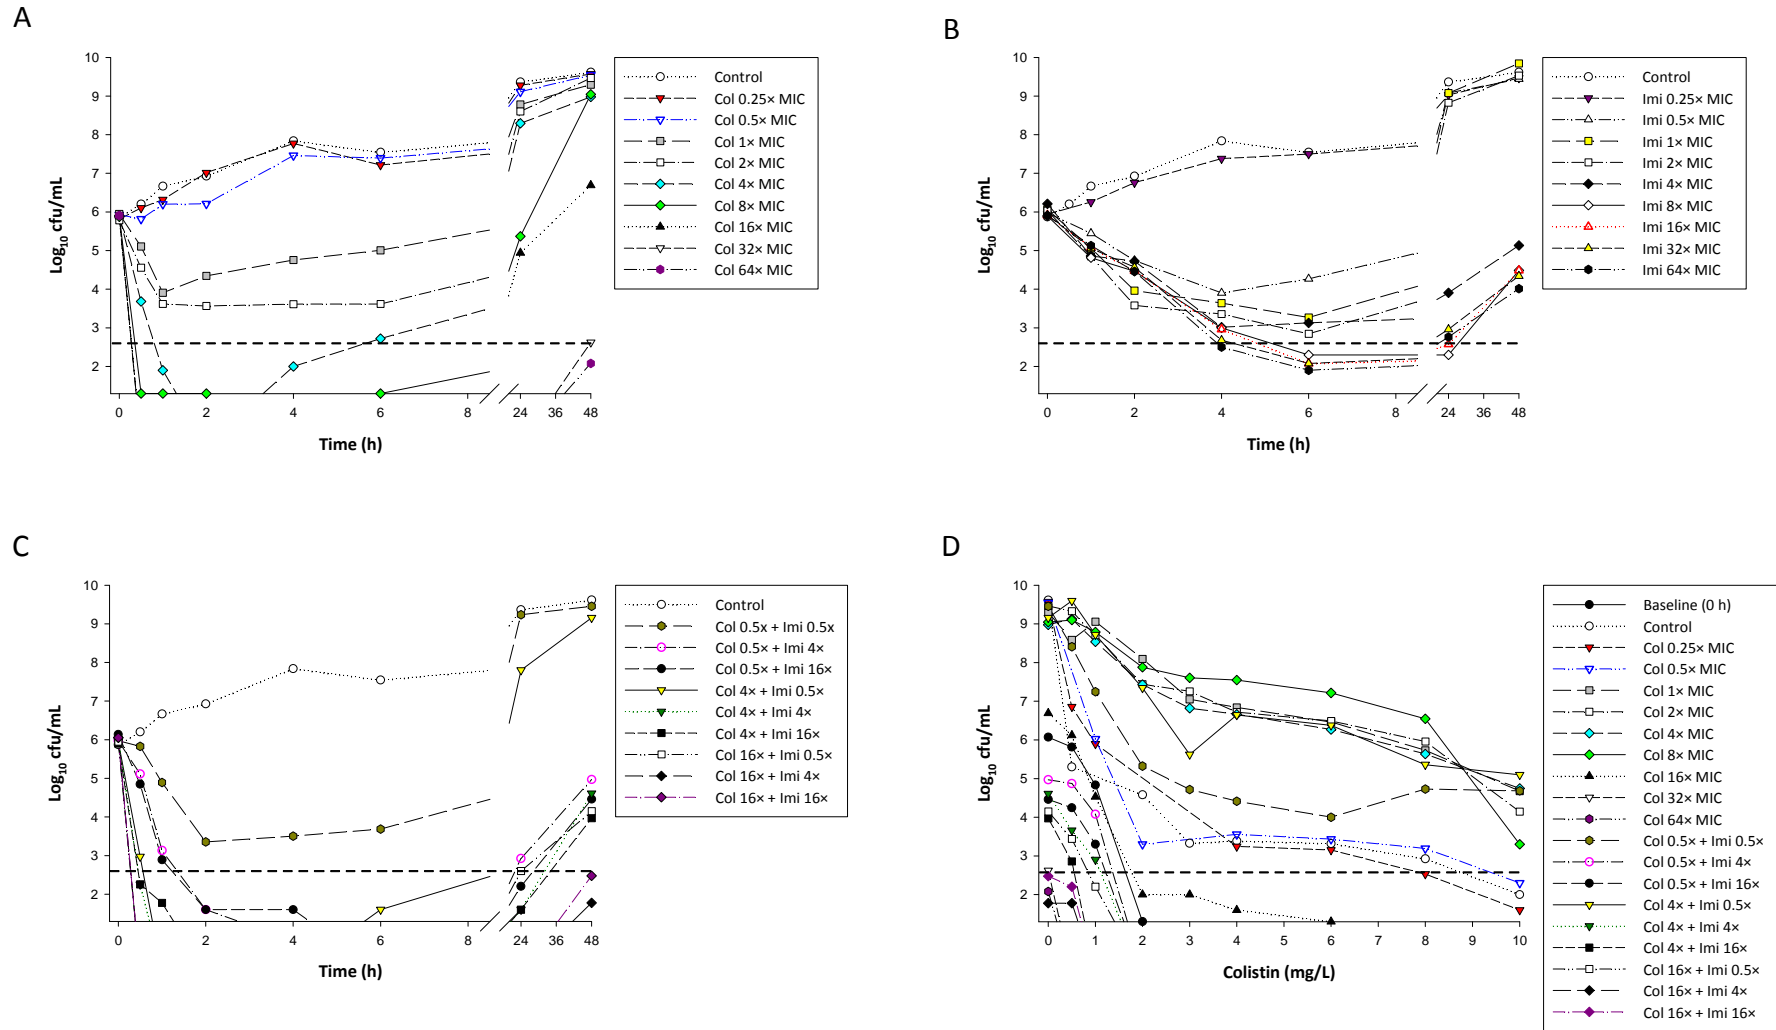

**Figure S8:** Time-kill curves for 20509 n/m at an inoculum of  $\sim 10^8$  cfu/mL with (A) colistin alone, (B) imipenem alone, and (C) in combination. Panel (D) shows the PAPs at baseline (0 h) and after 48 h exposure to colistin monotherapy, colistin/imipenem combination therapy, or neither antibiotic (control). The Y-axis starts from the limit of detection and the limit of quantification (LOQ) is indicated by the horizontal broken line.

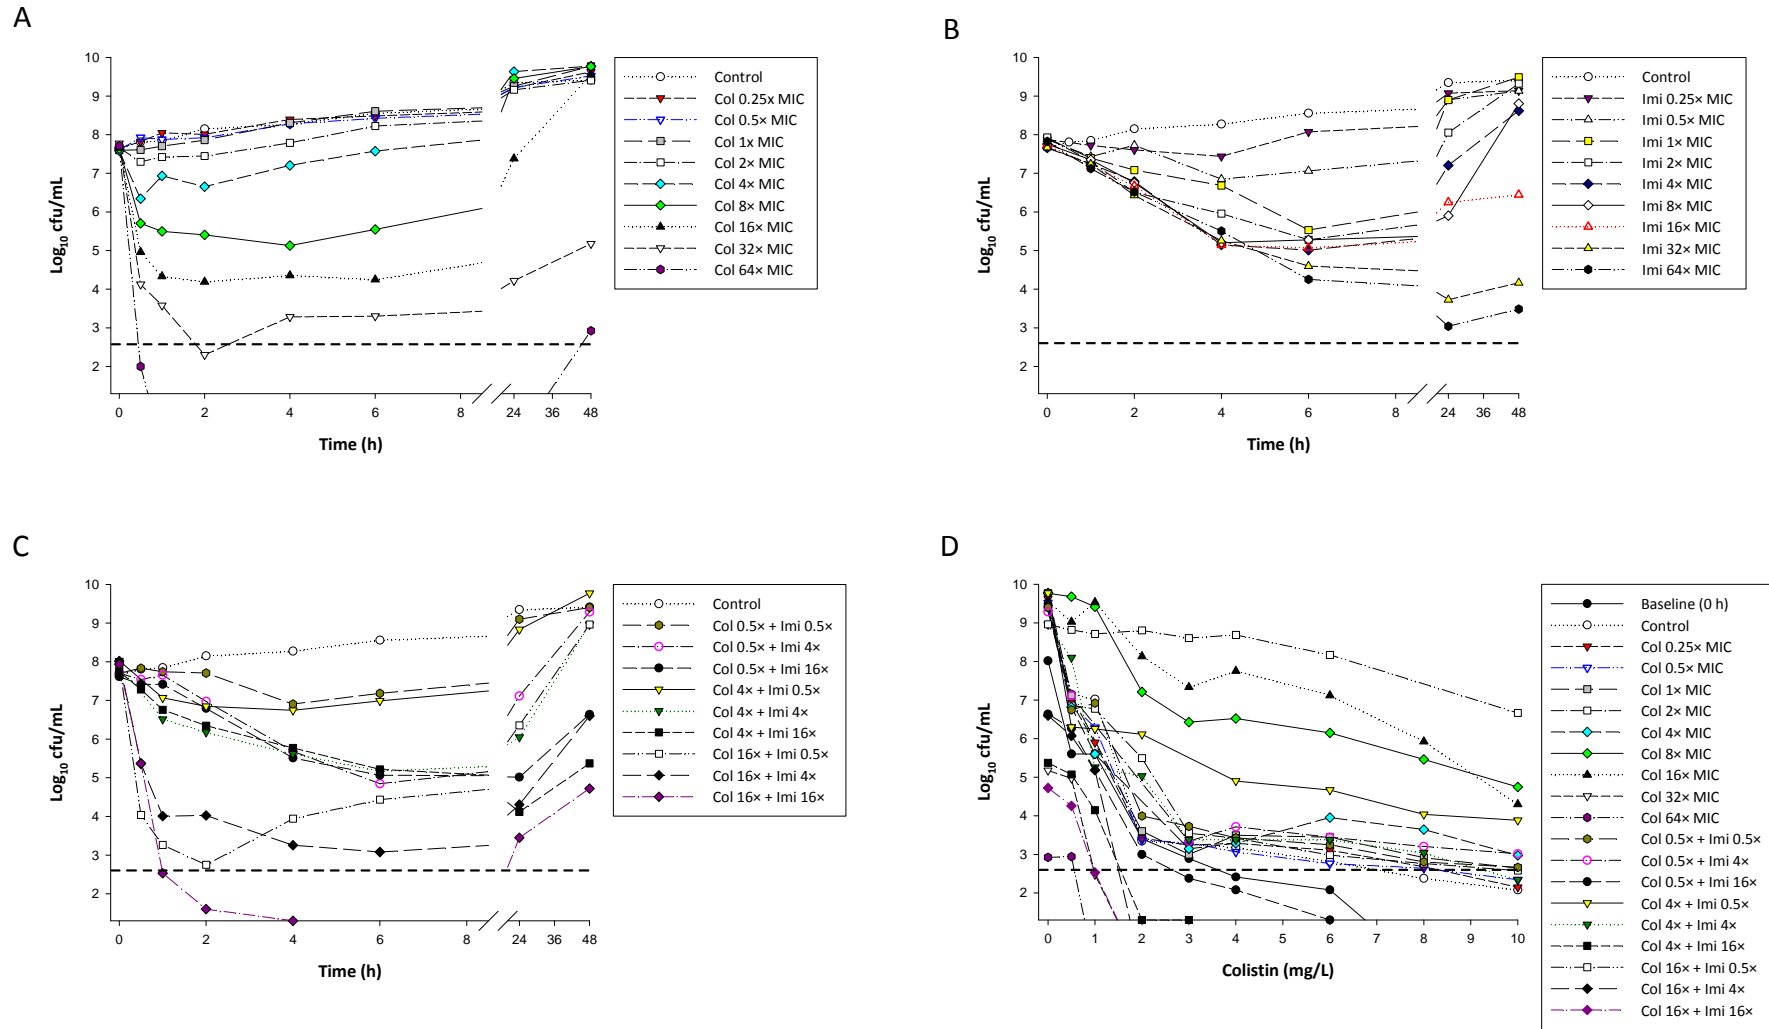

**Figure S9:** Time-kill curves for 19271 n/m at an inoculum of  $\sim 10^6$  cfu/mL with (A) colistin and imipenem alone, and (B) in combination. Panel (C) shows the PAPs at baseline (0 h) and after 48 h exposure to colistin monotherapy, colistin/imipenem combination therapy, or neither antibiotic (control). The Y-axis starts from the limit of detection and the limit of quantification (LOQ) is indicated by the horizontal broken line.

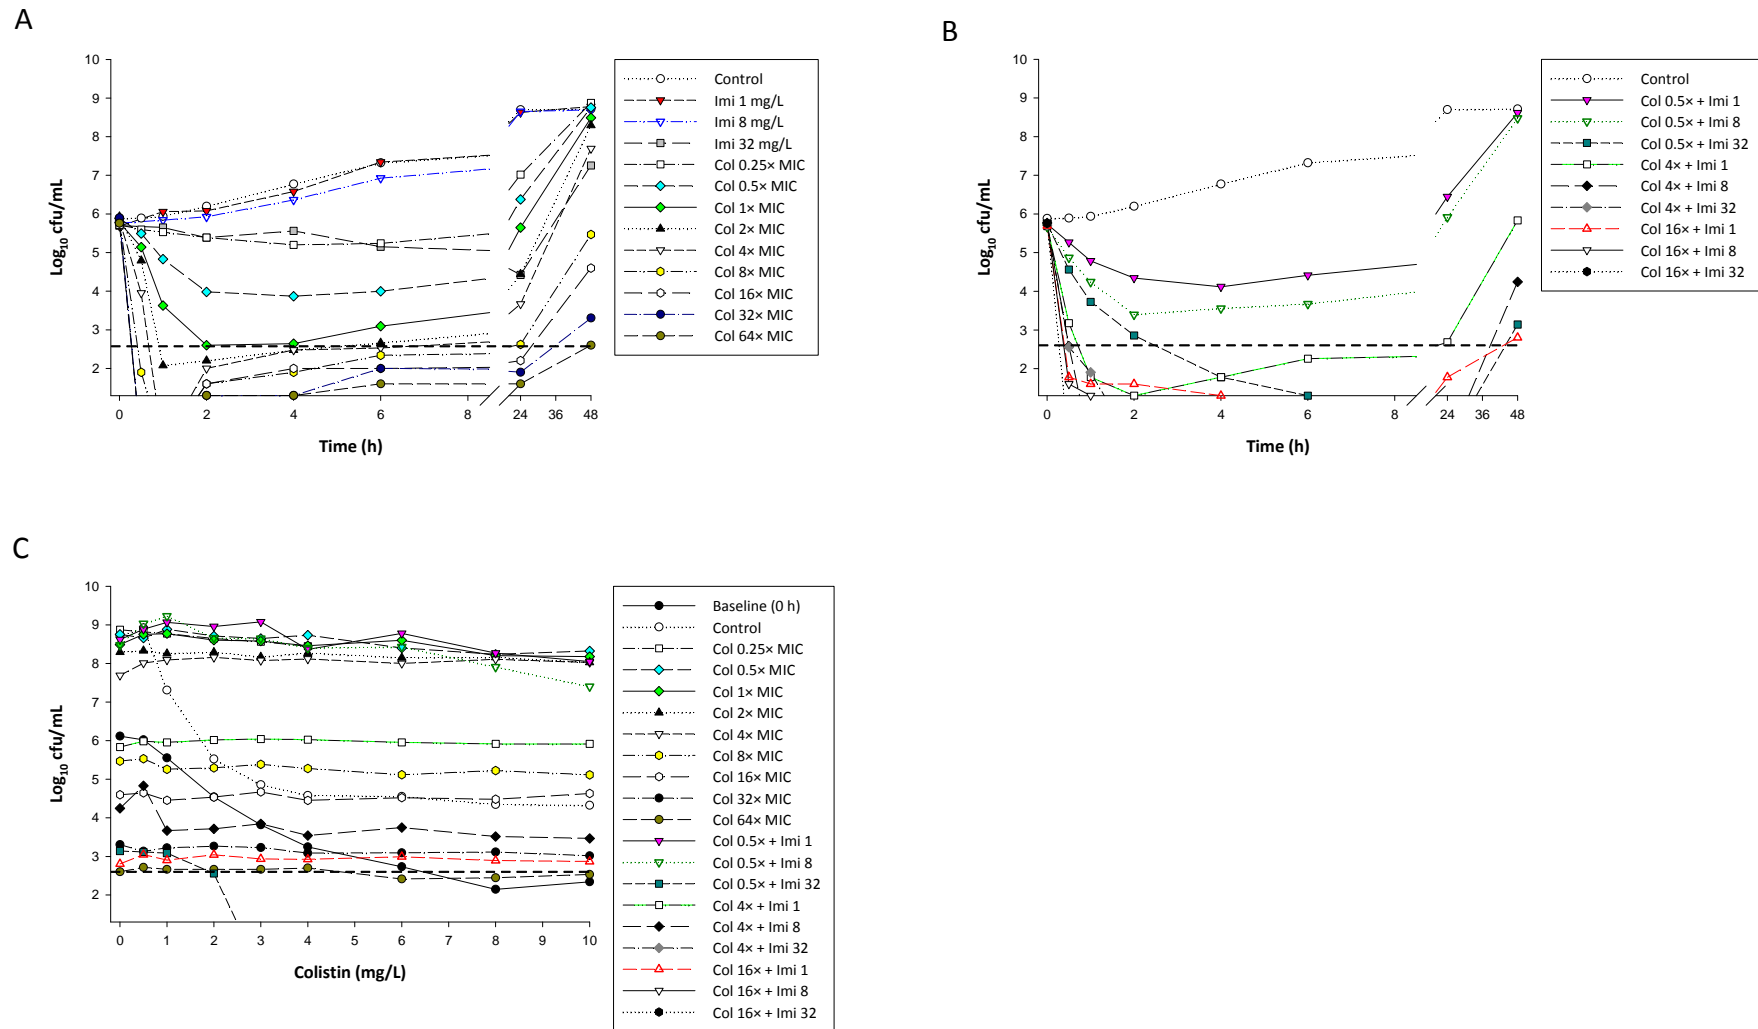

**Figure S10:** Time-kill curves for 19271 n/m at an inoculum of  $\sim 10^8$  cfu/mL with (A) colistin and imipenem alone, and (B) in combination. Panel (C) shows the PAPs at baseline (0 h) and after 48 h exposure to colistin monotherapy, colistin/imipenem combination therapy, or neither antibiotic (control). The Y-axis starts from the limit of detection and the limit of quantification (LOQ) is indicated by the horizontal broken line.

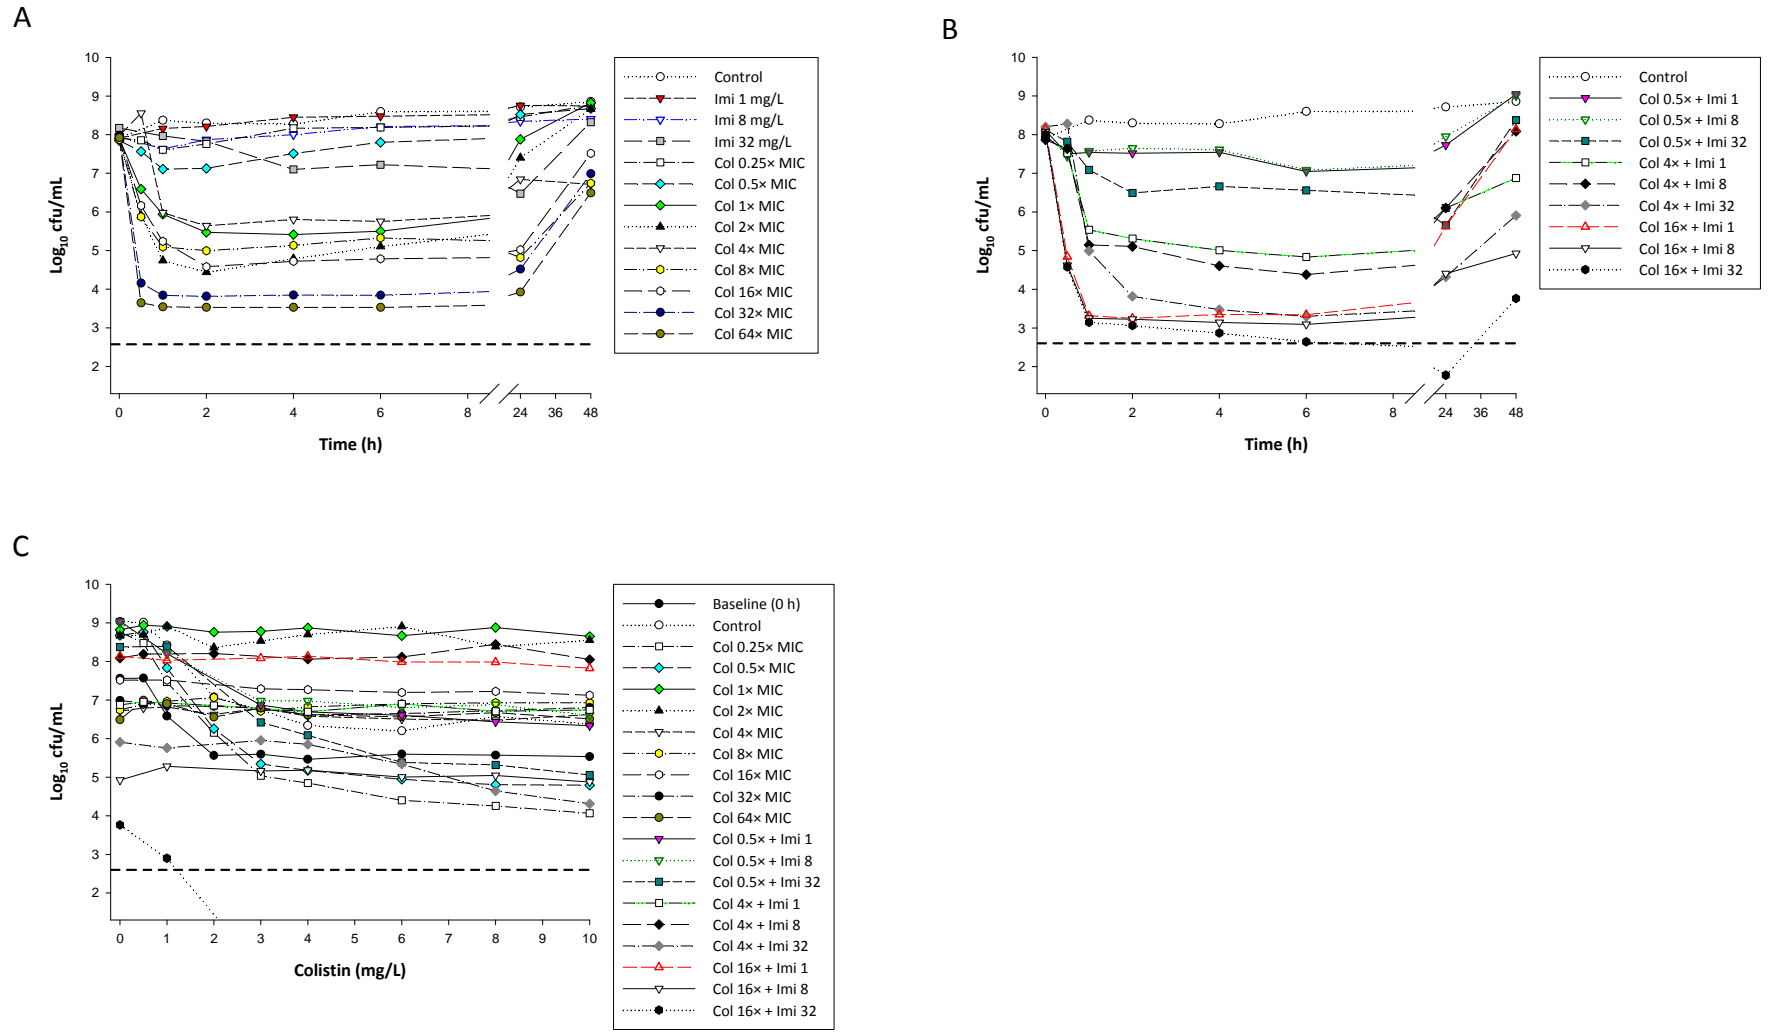

**Figure S11:** Time-kill curves for 20891 n/m at an inoculum of  $\sim 10^6$  cfu/mL with (A) colistin and imipenem alone, and (B) in combination. Panel (C) shows the PAPs at baseline (0 h) and after 48 h exposure to colistin monotherapy, colistin/imipenem combination therapy, or neither antibiotic (control). The Y-axis starts from the limit of detection and the limit of quantification (LOQ) is indicated by the horizontal broken line.

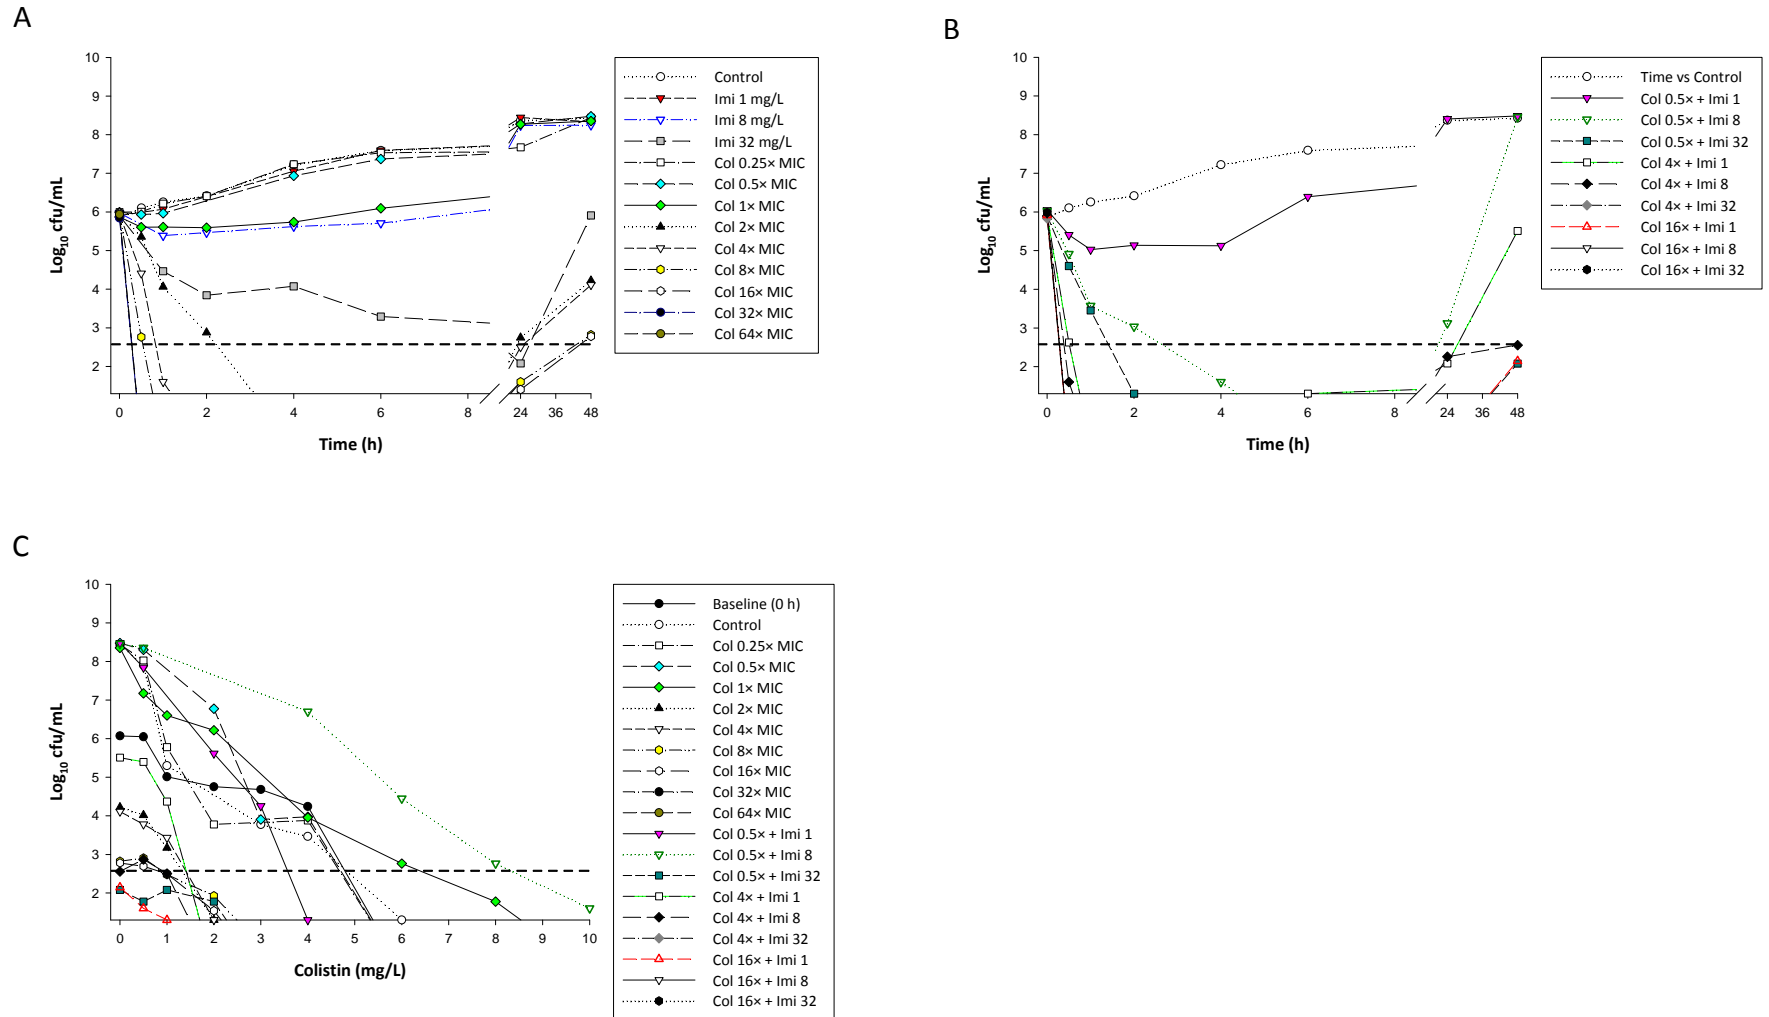

**Figure S12:** Time-kill curves for 20891 n/m at an inoculum of  $\sim 10^8$  cfu/mL with (A) colistin and imipenem alone, and (B) in combination. Panel (C) shows the PAPs at baseline (0 h) and after 48 h exposure to colistin monotherapy, colistin/imipenem combination therapy, or neither antibiotic (control). The Y-axis starts from the limit of detection and the limit of quantification (LOQ) is indicated by the horizontal broken line.

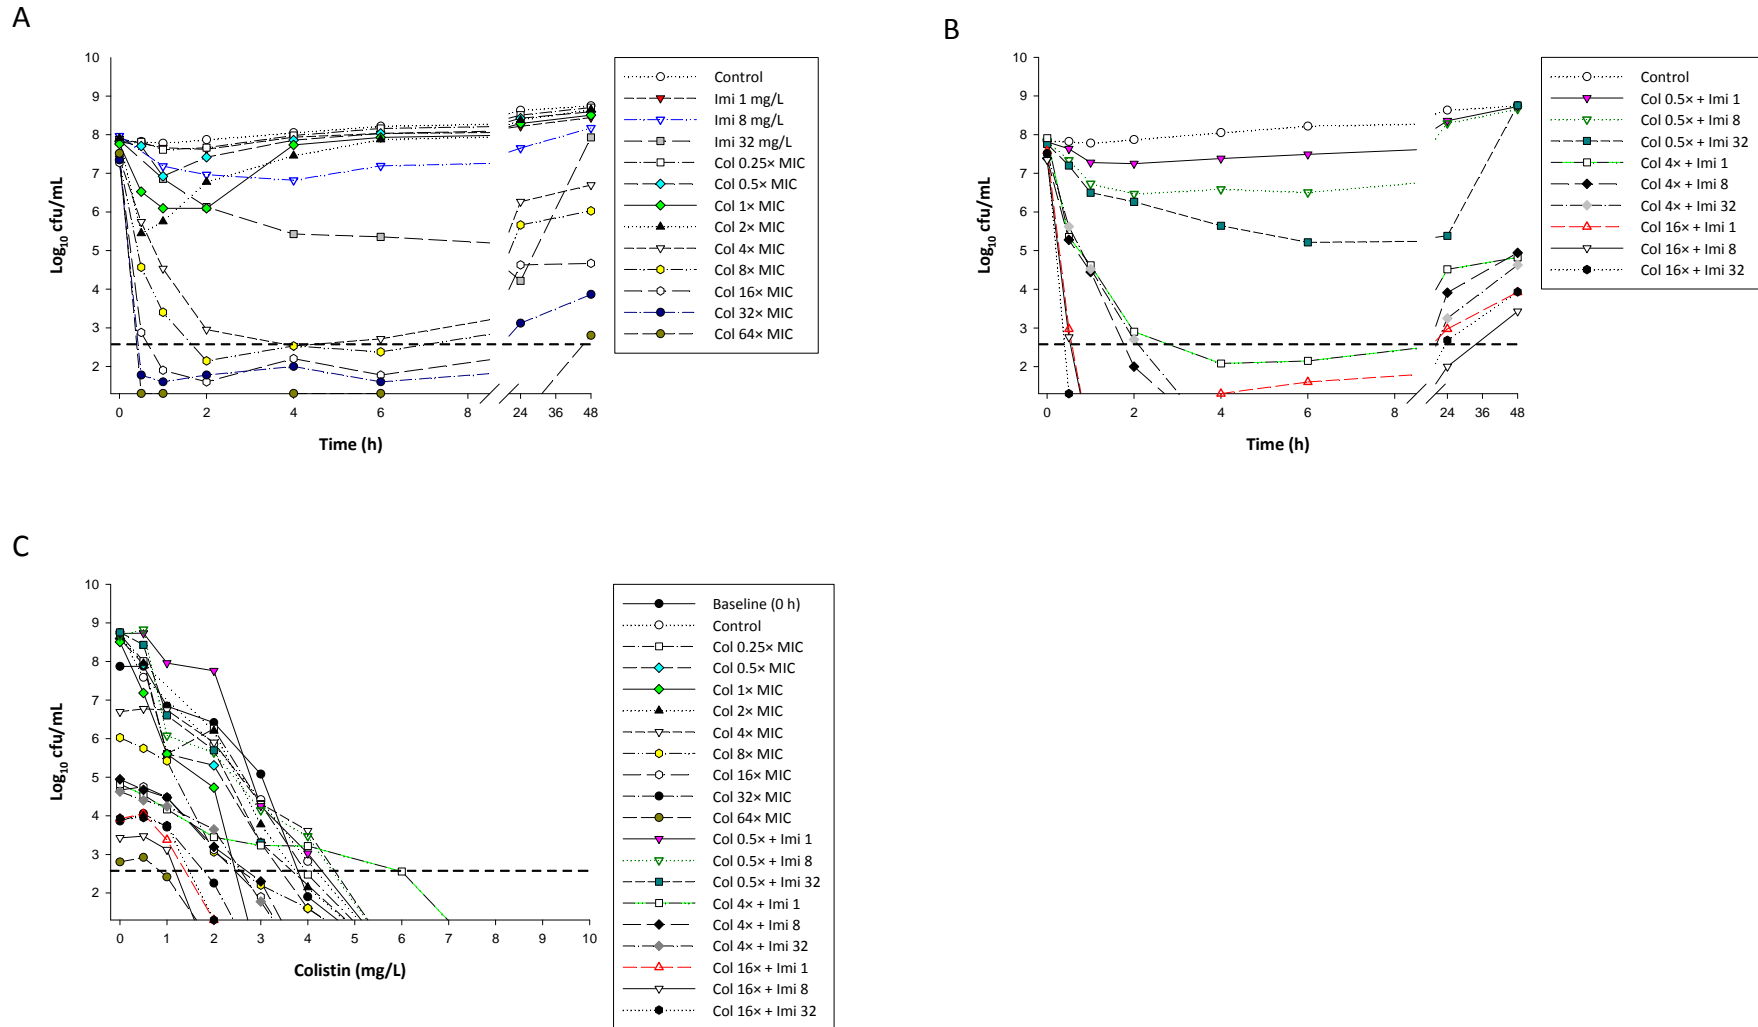

Supplement: supp_55_11_5134__1.pdf [file supp_55_11_5134__1.pdf]
